# Supplementary material for: Mesosilica-coated ultrafine fibers for highly efficient laccase encapsulation
Source: Royal Society of Chemistry journal article supplement (doi:10.1039/c4nr01166j), 2014-01-01
Supplement: c4nr01166j1.pdf [file c4nr01166j1.pdf]

Electronic supplementary information (ESI) for  
**Mesosilica-coated Ultrafine fibers for High Efficient Laccase  
Encapsulation**

Shiwen Wang<sup>a,b</sup>, Wei Chen<sup>c</sup>, Sha He<sup>b</sup>, Qilong Zhao<sup>b</sup>, Xiaohong Li<sup>\*a</sup>, Jiashu Sun<sup>\*b</sup> and  
Xingyu Jiang<sup>\*b</sup>

<sup>a</sup>Key Laboratory of Advanced Technologies of Materials, Ministry of Education of  
China, School of Materials Science and Engineering, Southwest Jiaotong University,  
Chengdu 610031, China; E-mail: [xhli@swjtu.edu.cn](mailto:xhli@swjtu.edu.cn)

<sup>b</sup>Beijing Engineering Research Center for BioNanotechnology & Key Lab for  
Biological Effects of Nanomaterials and Nanosafety, National Center for  
NanoScience and Technology, Beijing 100190, China;  
E-mail: [xingyujiang@nanoctr.cn](mailto:xingyujiang@nanoctr.cn); [sunjs@nanoctr.cn](mailto:sunjs@nanoctr.cn)

<sup>c</sup>University of Groningen, Zernike Institute for Advanced Materials, Department of  
Polymer Chemistry, Nijenborgh 4, 9747 AG, Groningen, the Netherlands

† Electronic supplementary information (ESI) available.

**Table S1:** The element analysis of PS ES fibers before silica modification (Before) and after silica modification (After).

| Elements | Atomic percentage |       |
|----------|-------------------|-------|
|          | Before            | After |
| C        | 94.90             | 82.40 |
| O        | 5.10              | 10.13 |
| S        | 0                 | 3.14  |
| Si       | 0                 | 3.13  |
| N        | 0                 | 1.21  |

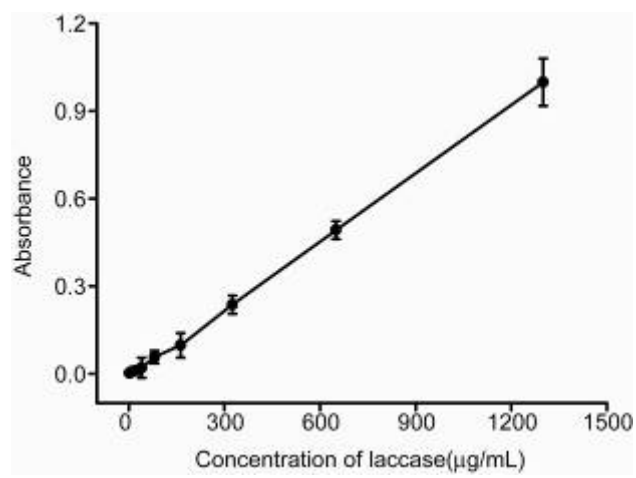

**Fig. S1** The relationship between concentration of laccase and the absorbance at 420 nm .

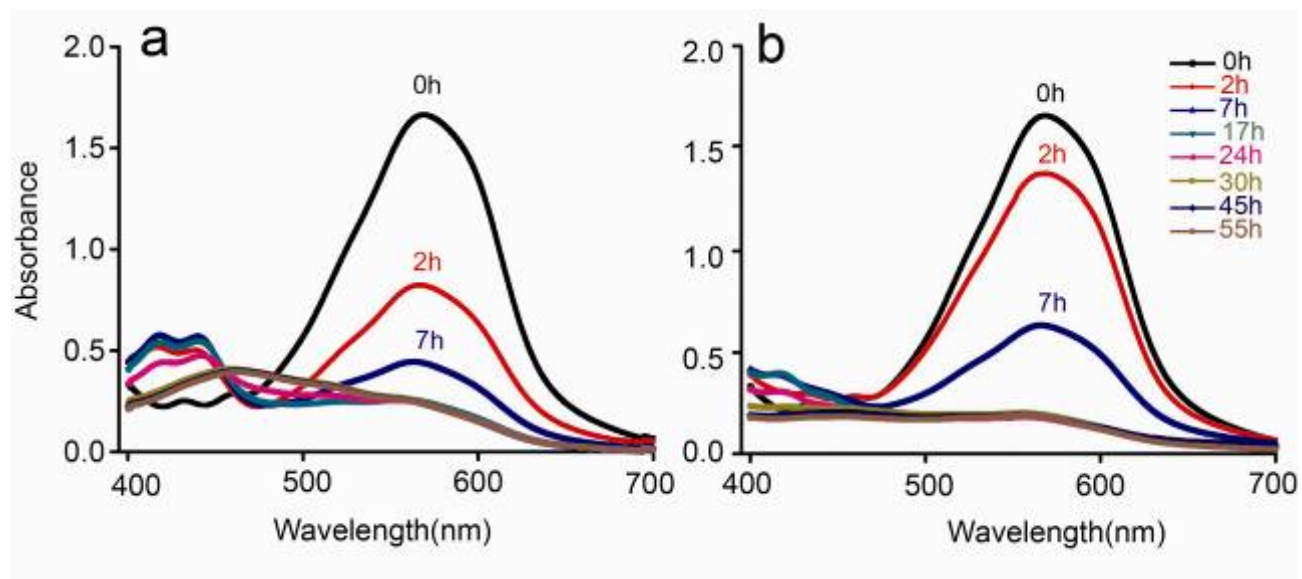

**Fig. S2** The absorption spectra of decoloured BBKN-R solutions by free laccase (a) and immobilized laccase (b) for different periods of time.
